# Supplementary material for: Caries prevalence and other dental pathological conditions in Vikings from Varnhem, Sweden
Source: PLoS One. 2023 Dec 13;18(12):e0295282. doi: 10.1371/journal.pone.0295282 (PMC10718447; doi:10.1371/journal.pone.0295282)
Supplement: S1 Table — This table contains the identity, biological markers and pathological conditions of the studied population. (XLSX) [file pone.0295282.s001.xlsx]

## Sheet: Blad1
Missing teeth	Ante mortem loss	Post mortem loss	Teeth wirt crown caries	Teeth with root caries	Caries free	Ocklusal cavity	Mesial cavity	Buccal cavity	Lingual cavity	Distal cavity	Root caries	Apical infection	Man	Woman	Age	Molar wear	Incisor wear
8	1	7	6	0	0	5	4	4	5	5	2	1	0	1	35-45	4	4
7	0	7	0	0	1	0	0	0	0	0	0	0	1	0	20-25	2	x
6	4	2	0	0	1	0	0	0	0	0	0	3	0	1	45-60	4	4
2	0	2	0	0	1	0	0	0	0	0	0	0	1	0	35-40	3	4
24	8	16	3	2	0	1	2	2	1	1	2	1	1	0	45-60	x	x
2	0	2	0	3	0	0	0	0	0	0	3	0	1	0	25-35	2	2
6	4	2	8	0	0	8	8	7	8	7	0	2	1	0	45-60	3	4
1	0	1	2	0	0	0	0	2	0	0	0	0	1	0	40-45	4	3
10	0	10	4	0	0	3	4	3	3	3	0	0	1	0	45-60	4	4
0	0	0	0	1	0	0	0	0	0	0	1	2	1	0	30-35	4	4
8	2	6	3	0	0	3	2	2	2	2	0	0	0	1	40-60	4	3
2	0	2	0	0	1	0	0	0	0	0	0	0	1	0	20-25	1	1
25	0	25	0	1	0	0	0	0	0	0	1	0	1	0	50+	x	x
3	2	1	0	8	0	0	0	0	0	0	8	2	1	0	30-35	4	3
10	3	7	0	0	1	0	0	0	0	0	0	0	1	0	40-45	4	4
3	0	3	0	0	1	0	0	0	0	0	0	2	1	0	30-35	3	4
4	2	2	1	0	0	1	1	0	0	0	0	0	0	1	25-30	2	4
7	4	3	7	2	0	7	7	6	6	6	2	2	1	0	35-50	4	4
20	19	1	2	0	0	2	1	2	2	2	0	0	0	1	50+	4	4
0	0	0	0	0	1	0	0	0	0	0	0	0	0	1	30-35	3	3
5	0	5	0	8	0	0	0	0	0	0	8	0	0	1	20-25	2	1
0	0	0	0	2	0	0	0	0	0	0	2	1	0	1	25	1	1
1	0	1	0	4	0	0	0	0	0	0	4	0	0	1	30-35	3	1
2	2	0	4	0	0	2	1	0	0	2	0	3	1	0	45-60	4	4
20	4	16	1	1	0	1	1	1	1	1	1	1	1	0	45-60	4	4
1	0	1	2	3	0	2	2	2	2	2	2	1	1	0	30-35	4	3
0	0	0	0	0	1	0	0	0	0	0	0	0	0	1	30-35	4	3
7	2	5	0	0	1	0	0	0	0	0	0	5	1	0	45-60	4	4
1	1	0	10	0	0	9	9	8	9	10	0	4	1	0	50+	4	4
3	0	3	0	2	0	0	0	0	0	0	2	0	1	0	25-30	3	2
1	0	1	1	6	0	1	0	0	0	0	6	0	0	1	25-30	1	1
10	0	10	4	3	0	2	3	3	2	3	3	2	0	1	45-60	4	2
14	4	10	1	7	0	1	1	0	0	0	7	1	0	1	45-60	4	X
2	0	2	0	0	1	0	0	0	0	0	0	0	1	0	40-45	4	4
4	2	2	1	6	0	0	1	0	0	0	6	1	1	0	30-35	4	4
3	2	1	2	4	0	2	2	2	2	2	4	2	1	0	45-60	4	4
1	0	1	4	0	1	0	0	0	0	0	0	4	1	0	35-45	4	4
7	6	1	3	0	0	3	3	3	3	3	0	0	1	0	45-60	4	4
9	0	9	0	0	1	0	0	0	0	0	0	0	1	0	30-40	3	3
1	0	1	4	0	0	2	2	0	0	3	0	2	1	0	20-25	4	4
12	5	7	6	0	0	6	6	6	6	6	0	2	1	0	50+	4	x
10	0	10	0	0	1	0	0	0	0	0	0	0	1	0	14-15	0	x
8	0	8	1	5	0	1	0	0	0	0	5	2	1	0	20-25	2	2
4	0	4	0	0	1	0	0	0	0	0	0	0	0	1	20-25	1	2
3	1	2	0	4	0	0	0	0	0	0	4	0	1	0	30-35	4	4
0	0	0	0	0	1	0	0	0	0	0	0	0	0	1	25-30	2	2
8	0	8	2	9	0	1	2	1	1	1	9	1	1	0	30-40	x	3
1	0	1	6	2	0	6	0	0	0	0	2	0	1	0	18-20	1	1
6	3	3	6	6	0	2	4	1	1	5	6	3	1	0	30-40	3	3
11	2	9	2	0	1	0	0	0	0	0	0	2	1	0	45-60	4	4
9	0	9	0	0	1	0	0	0	0	0	0	0	1	0	13-15	1	1
8	0	8	2	4	0	1	1	0	0	1	4	0	1	0	30-40	4	3
1	0	1	0	0	1	0	0	0	0	0	0	0	1	0	25	2	3
2	1	1	0	0	1	0	0	0	0	0	0	1	1	0	35-45	4	3
8	0	8	0	0	1	0	0	0	0	0	0	0	0	1	30-35	3	3
2	0	2	0	0	1	0	0	0	0	0	0	0	1	0	20-25	1	1
0	0	0	1	1	0	0	1	0	0	0	1	0	0	1	30-35	4	4
1	0	1	1	1	0	4	1	1	1	1	1	1	0	1	25	2	2
1	0	1	6	6	0	0	0	1	3	5	6	0	1	0	25-30	3	3
1	0	1	0	3	0	0	0	0	0	0	3	0	1	0	35-40	3	2
1	0	1	0	0	1	0	0	0	0	0	0	0	0	1	30-35	3	2
0	0	0	1	7	0	1	0	0	0	0	7	0	0	1	20-25	1	1
3	0	3	0	0	1	0	0	0	0	0	0	0	0	1	25-30	2	2
1	0	1	2	0	0	2	0	0	0	0	0	0	0	1	20-25	1	1
0	0	0	2	0	0	1	0	1	0	0	0	0	1	0	16-18	1	1
5	2	3	3	0	0	3	3	3	3	3	0	0	1	0	45-60	4	3
0	0	0	0	0	1	0	0	0	0	0	0	0	0	1	40-45	3	3
2	0	2	5	16	0	5	0	2	0	0	16	0	0	1	20-22	1	2
0	0	0	0	0	1	0	0	0	0	0	0	0	0	1	18-22	1	1
26	20	6	0	0	1	0	0	0	0	0	0	2	1	0	45-60	4	x
1	0	1	3	0	0	0	0	3	0	0	0	0	0	1	35-40	3	3
4	1	3	0	0	1	0	0	0	0	0	0	2	0	1	30-35	4	3
12	0	12	0	5	0	0	0	0	0	0	5	0	0	1	20-25	1	x
2	0	2	0	0	1	0	0	0	0	0	0	0	1	0	25-30	3	3
3	1	2	2	0	0	2	1	1	1	1	0	1	1	0	30-45	4	2
3	0	3	0	0	1	0	0	0	0	0	0	0	1	0	35-50	4	3
1	0	1	4	0	0	4	2	2	2	3	0	3	1	0	30-50	4	3
13	13	0	0	0	1	0	0	0	0	0	0	1	1	0	50+	4	4
0	0	0	0	0	1	0	0	0	0	0	0	0	1	0	25-40	2	2
0	0	0	0	0	1	0	0	0	0	0	0	0	0	1	25-35	2	2
13	10	3	15	3	0	14	13	12	13	13	3	2	0	1	50+	x	4
0	0	0	1	3	0	1	0	0	0	0	3	0	1	0	16-18	1	1
3	1	2	2	1	0	2	2	2	2	2	1	3	0	1	45-60	4	4
1	0	1	0	0	1	0	0	0	0	0	0	0	1	0	25-40	3	3
1	1	0	0	2	0	0	0	0	0	0	2	1	1	0	25-40	3	3
5	3	2	4	5	0	3	2	2	3	3	5	2	1	0	40-60	4	2
0	0	0	0	1	0	0	0	0	0	0	1	0	1	0	18-20	1	1
0	0	0	2	20	0	0	0	0	0	1	20	0	1	0	25-35	3	3
14	1	13	3	2	0	3	2	2	2	2	2	2	0	1	40-60	4	4
0	0	0	2	1	0	2	0	0	0	0	1	1	1	0	30-45	3	3
2	0	2	4	9	0	1	3	0	0	3	9	0	1	0	30-50	4	2
1	0	1	2	0	0	2	2	2	2	2	0	2	0	1	35-50	3	1
2	1	1	7	2	0	5	4	1	1	3	2	3	0	1	25-35	3	3
0	0	0	3	0	0	3	0	0	0	0	0	0	0	1	25-40	3	3
22	0	22	2	0	0	2	0	0	0	0	0	0	1	0	20-30	x	x
14	0	14	0	0	1	0	0	0	0	0	0	0	1	0	25-35	2	2
4	0	4	4	2	0	3	3	2	2	3	2	9	1	0	40-60	4	4
1	0	1	3	9	0	2	1	0	1	1	9	0	0	1	20-30	2	1
8	5	3	9	0	0	9	9	9	9	9	0	5	1	0	45-60	x	3
0	0	0	0	0	1	0	0	0	0	0	0	0	1	0	25-35	2	3
12	12		0	0	1	0	0	0	0	0	0	1	0	1	50+	4	4
19	0	19	1	3	0	1	0	0	0	0	3	0	1	0	30-50	x	x
1	1	0	0	0	1	0	0	0	0	0	0	0	1	0	35-50	4	4
8	7	1	2	0	0	2	2	2	2	2	0	6	0	1	50+	4	3
20	5	15	4	1	0	1	3	0	0	1	1	1	0	1	40-60	x	x
10	0	10	4	0	0	4	4	4	4	4	0	1	0	1	50+	4	4
5	2	3	5	0	0	4	3	1	1	2	0	0	1	0	35-50	3	1
12	0	12	4	0	0	4	0	0	0	0	0	0	1	0	20-25	2	3
1	1	0	0	0	1	0	0	0	0	0	0	0	1	0	30-40	4	3
10	0	10	1	0	0	0	0	1	0	0	0	0	1	0	20-25	3	3
1	0	1	0	0	1	0	0	0	0	0	0	0	1	0	20-30	4	2
5	1	4	0	4	0	0	0		0	0	4	1	1	0	30-50	4	2
2	2	0	0	0	1	0	0	0	0	0	0	0	1	0	25-35	2	3
17	0	17	0	0	1	0	0	0	0	0	0	0	1	0	13-15	1	1
3	2	1	4	0	0	3	3	3	3	4	0	8	1	0	50+	4	3
2	1	1	8	3	0	5	6	4	4	6	3	3	1	0	50+	4	4
3	2	1	0	3	0	0	0	0	0	0	3	2	0	1	40-60	4	4
4	1	3	0	0	1	0	0	0	0	0	0	0	1	0	40-50	4	4
8	0	8	0	13	0	0	0	0	0	0	13	0	1	0	20-25	1	x
0	0	0	0	4	0	0	0	0	0	0	4	0	1	0	20-25	3	3
0	0	0	2	1	0	2	0	0	0	0	1	0	0	1	15-17	1	2
0	0	0	2	0	0	0	2	0	0	0	0	0	0	1	25-35	2	1
1	0	1	5	1	0	1	3	1	1	4	1	3	1	0	40-60	4	3
7	0	7	4	2	0	1	0	4	0	0	2	0	0	1	25-30	3	x
9	1	8	0	0	1	0	0	0	0	0	0	0	0	1	30-50	3	2
3	0	3	0	0	1	0	0	0	0	0	0	0	1	0	13-15	1	1
0	0	0	0	0	1	0	0	0	0	0	0	0	1	0	30-50	4	3
16	0	16	0	0	1	0	0	0	0	0	0	0	1	0	30-40	x	x
0	0	0	3	0	0	3	0	0	0	0	0	0	1	0	30-40	3	3
21	7	14	0	0	1	0	0	0	0	0	0	0	1	0	50+	4	x
19	0	19	0	0	1	0	0	0	0	0	0	0	0	1	25-35	2	x
19	0	19	0	0	1	0	0	0	0	0	0	0	1	0	25-35	2	x
